# Supplementary material
Source: Royal Society of Chemistry journal article supplement (doi:10.1039/d6py00380j)
Supplement: d6py00380j1.pdf [file d6py00380j1.pdf]

## Supporting Information

# Engineering Bio-Based Eutectogels from Casein via 3D Printing

Sebastián Locatelli<sup>1</sup>, Gisela C. Luque<sup>1,2</sup>, Ludmila I. Ronco<sup>1,3</sup>, Oihane Varela<sup>4</sup>, Xabier López de Pariza<sup>4</sup>, David Mecerreyes<sup>5,6\*</sup>, Roque J. Minari<sup>1,3\*</sup>

<sup>1</sup> Polymer Reaction Engineering Group, INTEC (Universidad Nacional del Litoral-CONICET), Güemes 3450, Santa Fe 3000, Argentina.

<sup>2</sup> Center for Cooperative Research in Biomaterials (CICBiomaGUNE), Basque Research and Technology Alliance (BRTA), Donostia-San Sebastián 20014, Spain.

<sup>3</sup> Facultad de Ingeniería Química (Universidad Nacional del Litoral), Santiago del Estero 2829, Santa Fe 3000, Argentina.

<sup>4</sup> POLYMAT and Department of Polymers and Advanced Materials: Physics, Chemistry and Technology, Faculty of Chemistry, University of the Basque Country UPV/EHU, Donostia-San Sebastián 20018, Spain

<sup>5</sup> POLYMAT, University of the Basque Country UPV/EHU, Joxe Mari Korta Center 72, Donostia-San Sebastian 20018, Spain.

<sup>6</sup> Ikerbasque, Basque Foundation for Science, Plaza Euskadi 5, 48009 Bilbao, Spain

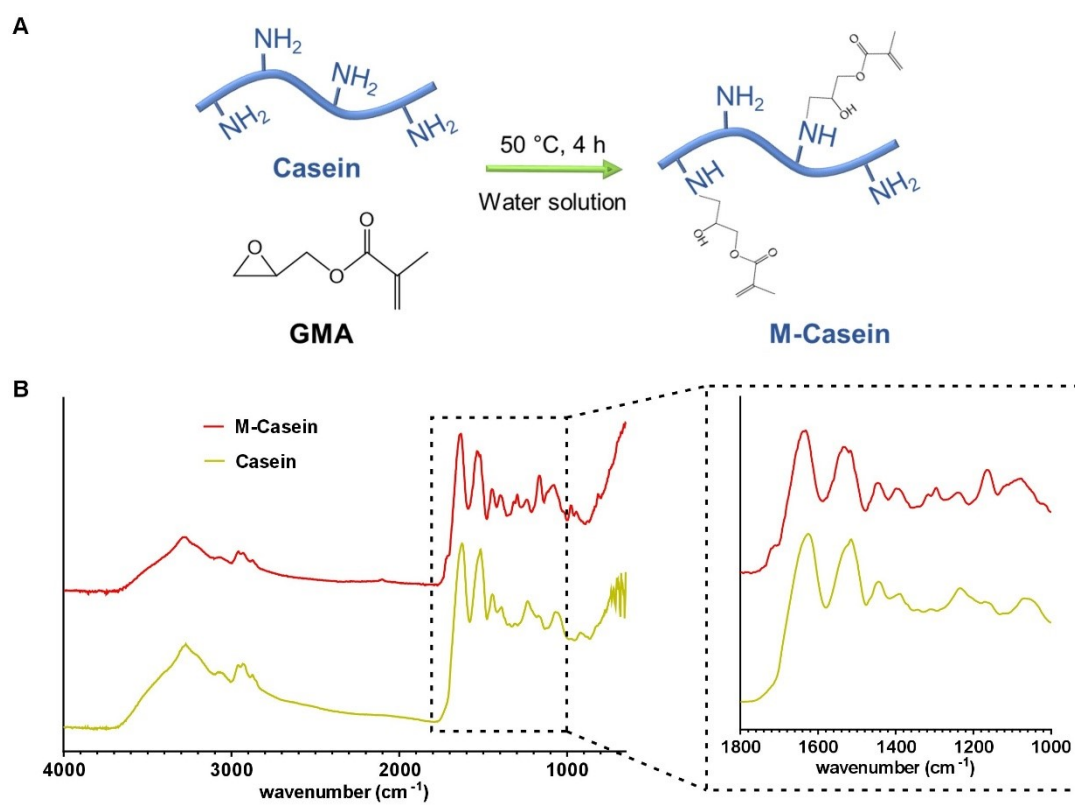

Figure S1. (A) Scheme of the synthesis of M-casein with GMA. (B) ATR-FTIR spectra of casein and M-casein.

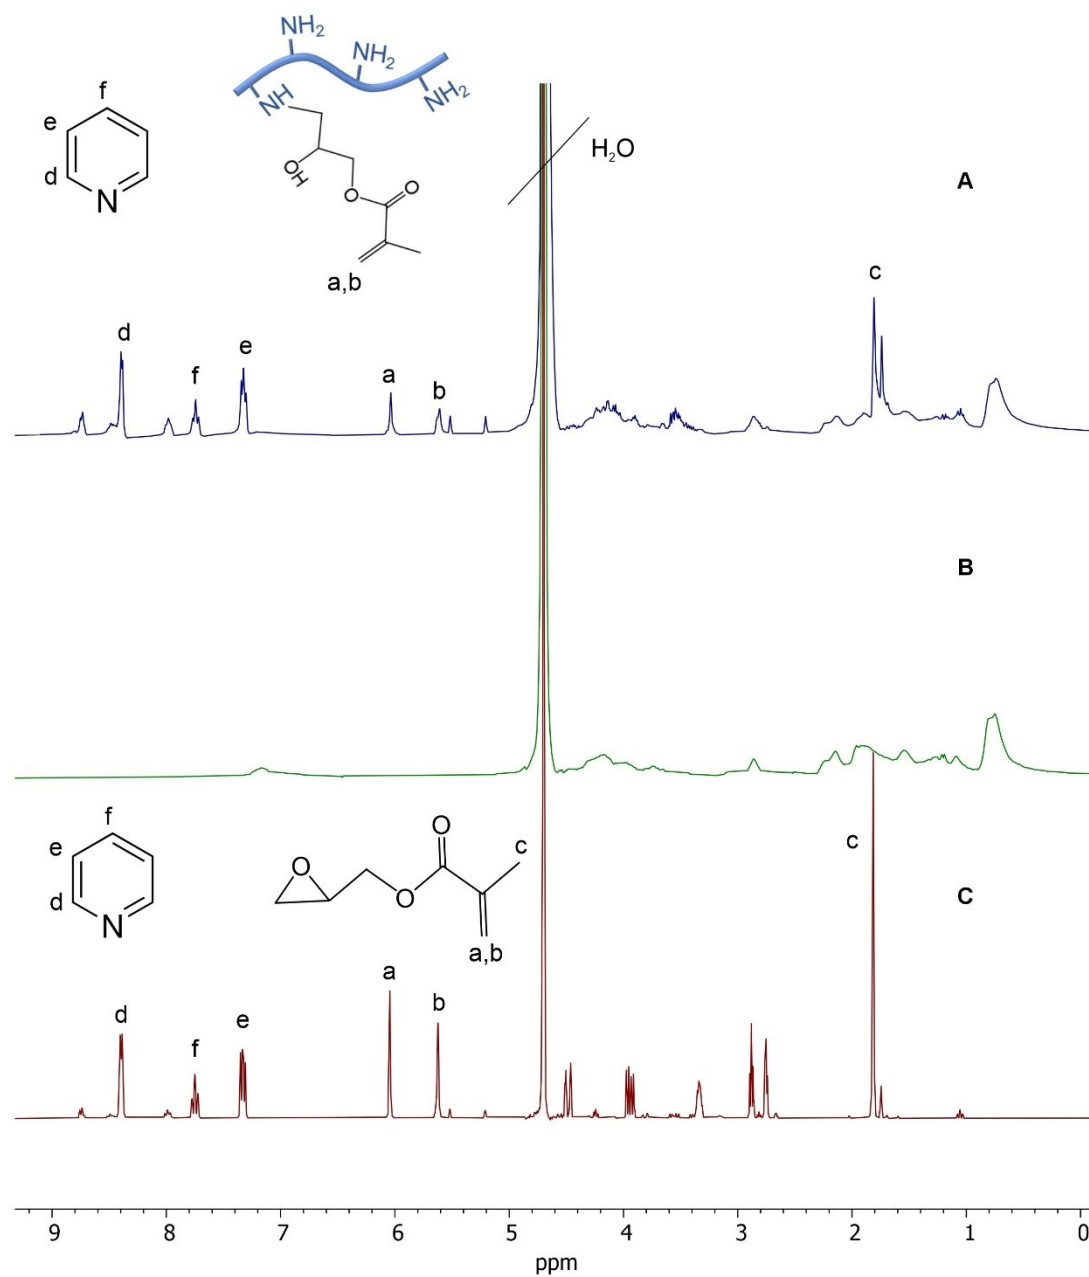

Figure S2.  $^1\text{H}$  NMR spectra of M-casein (A), native casein (B) and a mixture of pyridine and GMA used in the calibration curve (C), all of them in  $\text{D}_2\text{O}$ .

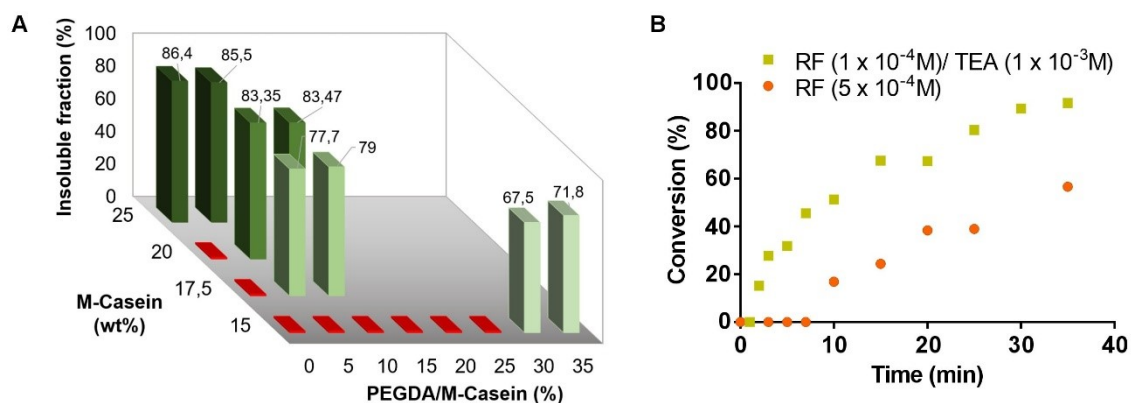

Figure S3. (A) Insoluble fraction for different formulations containing variable concentration of M-casein and PEGDA, photo-polymerized during 20 min in bulk using RF ( $5 \times 10^{-4}$  M) as photo-initiator. Formulations without gel formation are indicated in red. (B) Photo-polymerization kinetics given by % vinyl groups of M-casein and PEGDA conversion vs irradiation time (min) for the formulation with 17.5 wt% of M-casein and 30% of PEGDA, using different photoinitiator systems.

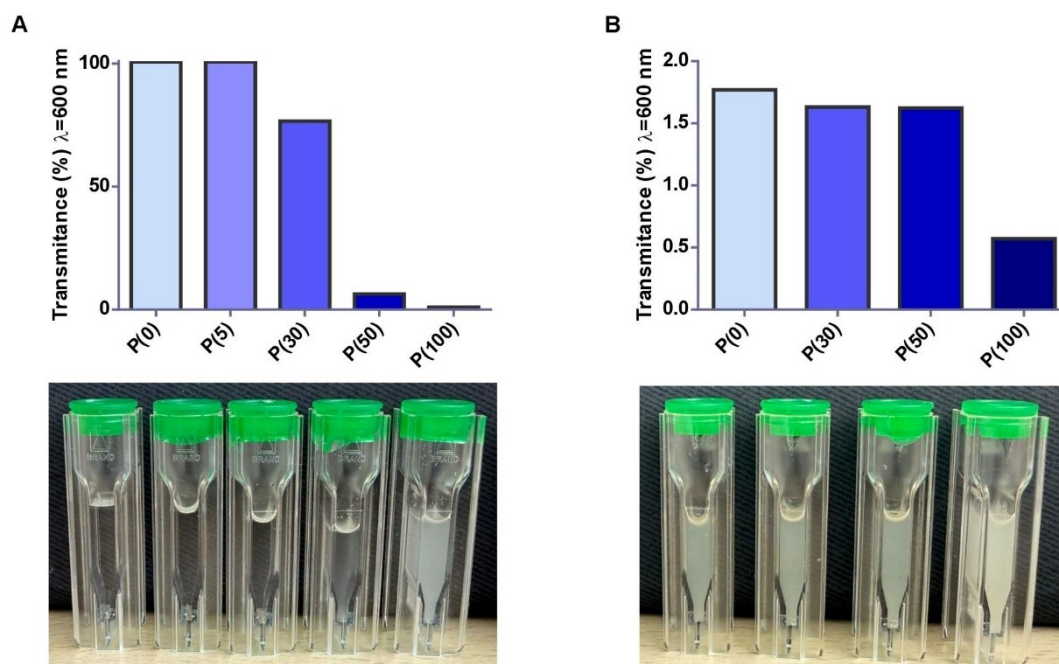

Figure S4: Transmittance at 600 nm of precursor solutions (water/D<sub>1</sub>, 50/50) containing different PEGDA contents, in the absence (A) and presence (B) of 12.5 wt% M-casein, along with photographs of the corresponding mixtures.

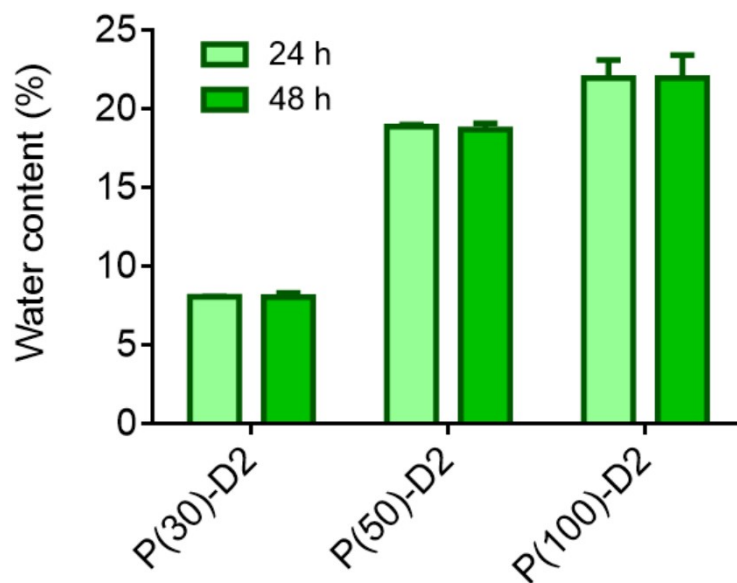

Figure S5: Equilibrium water content (wt% relative to the initial water content, Eq. 3) of  $D_2$ -based gels with different PEGDA content after being exposed to a controlled humidity and temperature atmosphere (75% RH at 25 °C) for 24 h and 48 h.

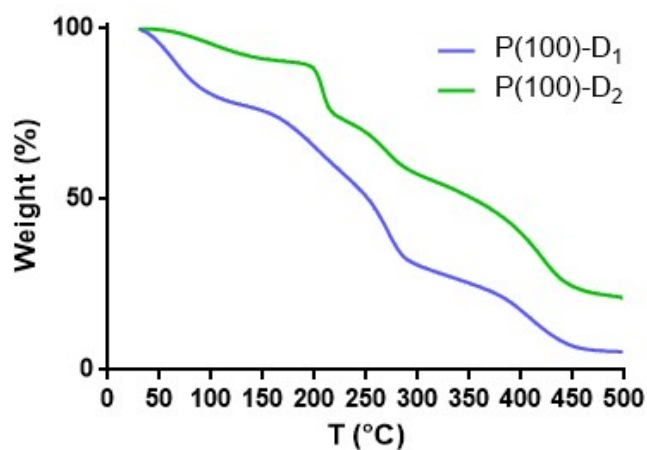

Figure S6: TGA results for P(100)-D<sub>1</sub> (A) and P(100)-D<sub>2</sub> (B) formulations.

Table S1: Eutectogel composition based on M-Casein after synthesis (initial formulation) and after being exposed to 75% RH at 25 °C for 24 h (equilibrium content).

| Formulation           | Initial/final stage | M-casein | PEGDA<br>(wt relative to M-Casein) | DES<br>(wt relative to M-Casein) | Water<br>(wt relative to M-Casein) |
|-----------------------|---------------------|----------|------------------------------------|----------------------------------|------------------------------------|
| P(30)-D <sub>1</sub>  | Initial formulation | 1.00     | 0.30                               | 2.85                             | 2.85                               |
|                       | Equilibrium content | 1.00     | 0.30                               | 2.86                             | 2.09                               |
| P(50)-D <sub>1</sub>  | Initial formulation | 1.00     | 0.50                               | 2.85                             | 2.85                               |
|                       | Equilibrium content | 1.00     | 0.50                               | 2.85                             | 2.24                               |
| P(100)-D <sub>1</sub> | Initial formulation | 1.00     | 1.00                               | 2.85                             | 2.85                               |
|                       | Equilibrium content | 1.00     | 1.00                               | 2.85                             | 2.08                               |
| P(30)-D <sub>2</sub>  | Initial formulation | 1.00     | 0.30                               | 2.85                             | 2.85                               |
|                       | Equilibrium content | 1.00     | 0.30                               | 2.86                             | 0.23                               |
| P(50)-D <sub>2</sub>  | Initial formulation | 1.00     | 0.50                               | 2.85                             | 2.85                               |
|                       | Equilibrium content | 1.00     | 0.50                               | 2.86                             | 0.54                               |
| P(100)-D <sub>2</sub> | Initial formulation | 1.00     | 1.00                               | 2.85                             | 2.85                               |
|                       | Equilibrium content | 1.00     | 1.00                               | 2.86                             | 0.63                               |

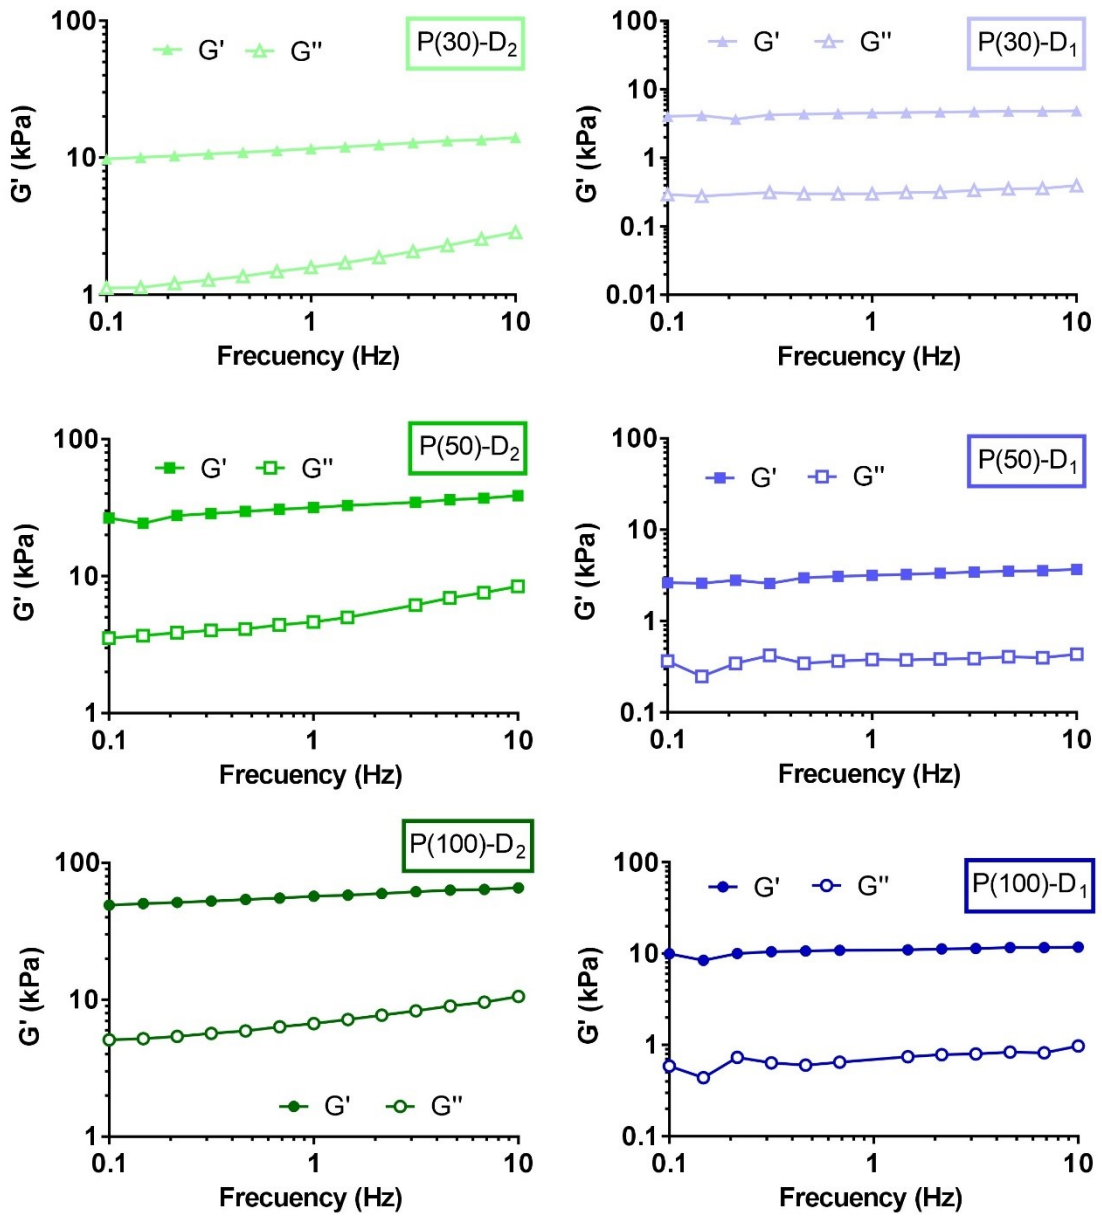

Figure S7: Frequency sweep test of each eutectogel formulation.

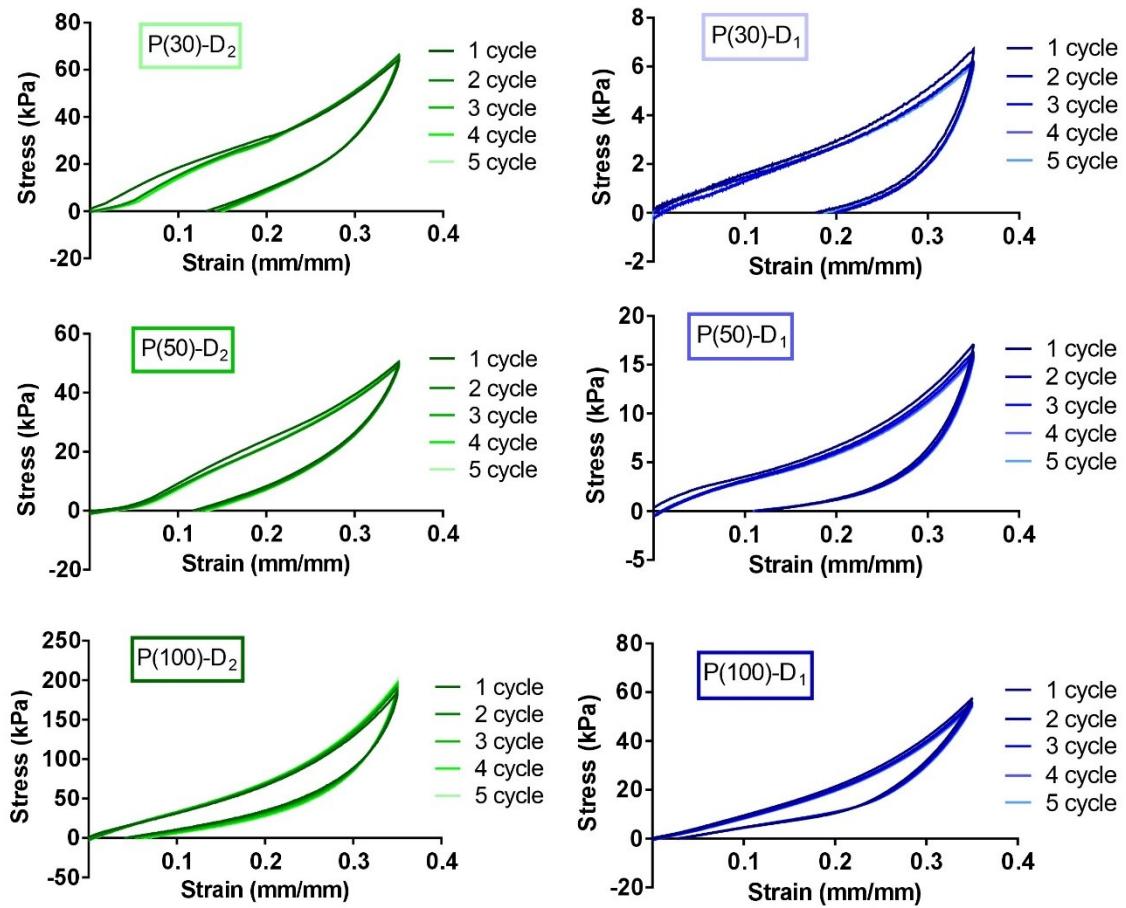

Figure S8. Cycles of loading-unloading compression test of  $D_1$ -based eutectogels (right) and  $D_2$ -based eutectogels (left)

| P(30)-D1     |              |            |
|--------------|--------------|------------|
| Element      | Fitted Value | Unit       |
| R 1          | 270.0        | $\Omega$   |
| R 2          | 151.6        | $\Omega$   |
| T 1          | 4627         | $\sigma$   |
| T 1          | 0.010        | $\sqrt{s}$ |
| T 1          | 0.879        | $\varphi$  |
| C 1          | 2,95E-04     | F          |
| Chi-Squared: | Iterations:  |            |
| 0.0611       | 28           |            |

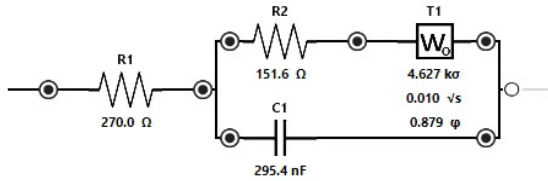

| P(50)-D1     |              |            |
|--------------|--------------|------------|
| Element      | Fitted Value | Unit       |
| R 1          | 170.0        | $\Omega$   |
| R 2          | 121.9        | $\Omega$   |
| T 1          | 2933         | $\sigma$   |
| T 1          | 0.008        | $\sqrt{s}$ |
| T 1          | 0.893        | $\varphi$  |
| C 1          | 4,17E-04     | F          |
| Chi-Squared: | Iterations:  |            |
| 0.1138       | 15           |            |

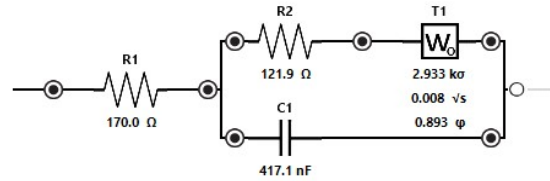

| P(100)-D1    |              |            |
|--------------|--------------|------------|
| Element      | Fitted Value | Unit       |
| R 1          | 396.7        | $\Omega$   |
| R 2          | 210.3        | $\Omega$   |
| T 1          | 5319         | $\sigma$   |
| T 1          | 0.011        | $\sqrt{s}$ |
| T 1          | 0.872        | $\varphi$  |
| C 1          | 1,99E-04     | F          |
| Chi-Squared: | Iterations:  |            |
| 0.0931       | 20           |            |

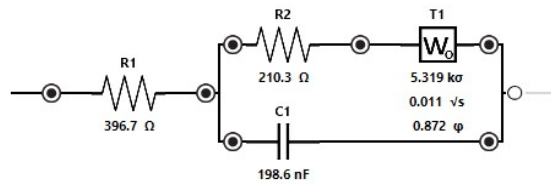

Figure S9. Fitted parameters from the Nyquist plot of different  $D_1$  formulations accompanied by the Randles circuit with the fitting parameters. The elements included in this circuit are: the resistor  $R_{gel}$  ( $R_1$ ) in series with the others elements, which defines the resistance between the electrolyte and the electrode; the resistor  $R_{ct}$  ( $R_2$ ), representing the charge transfer resistance, in parallel with the capacitor  $C_{dl}$  ( $C_1$ ), which describes the double layer capacitance present in the gel-electrode interface; and finally, the Warburg impedance  $Z_w$  (composed of three different elements  $T_1$ ), which accounts for impedance produced for the ion diffusion within the gel electrolyte.

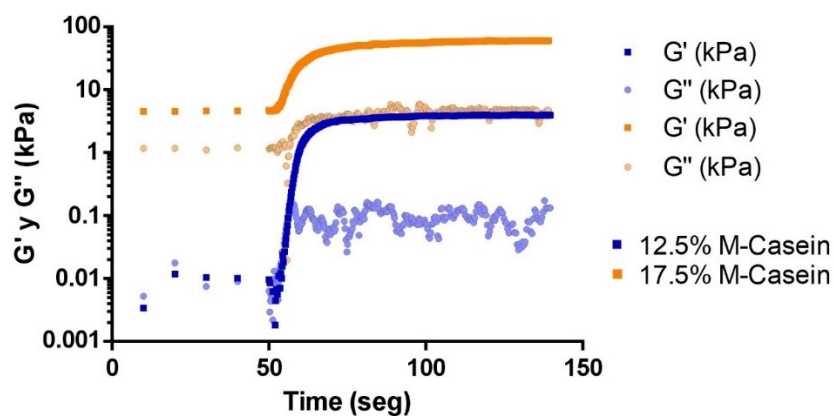

Figure S10: Photorheology comparing the use of LAP as a photoinitiator in formulation containing 12.5 wt% of M-casein and 17.5 wt% of M-casein (30% PEGDA).

Table S2: Ionic conductivity of P(30)-D<sub>1</sub>-12.5 and P(40)-D<sub>1</sub>-12.5 formulations from EIS measurements performed at different AC voltage amplitudes.

| Formulation                | Amplitude (mV) | Ionic conductivity (S/cm) |
|----------------------------|----------------|---------------------------|
| P(30)-D <sub>1</sub> -12.5 | 5              | 1.81E-02                  |
|                            | 10             | 1.80E-02                  |
|                            | 20             | 1.79E-02                  |
| P(40)-D <sub>1</sub> -12.5 | 5              | 1.20E-02                  |
|                            | 10             | 1.17E-02                  |
|                            | 20             | 1.15E-02                  |

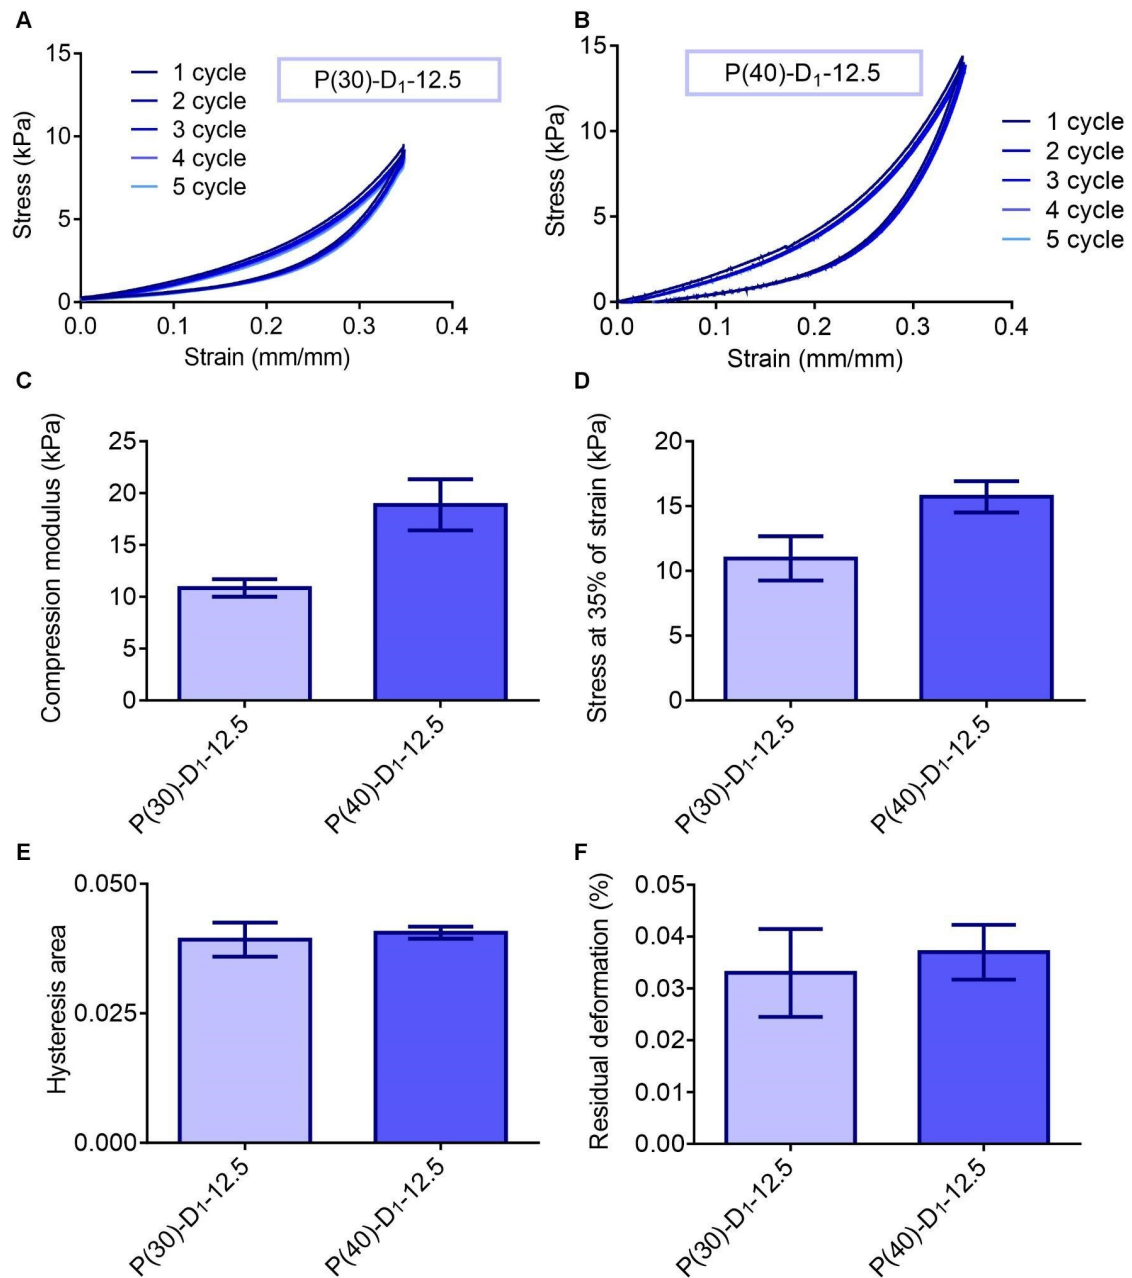

Figure S11: Loading and un-loading repeated compression cycles (A and B). Compression modulus (C), stress at 35% of strain (D), Hysteresis area (E) and residual deformation (F) calculated from compression test of 3D printing formulation.
